# Supplementary material
Source: Royal Society of Chemistry journal article supplement (doi:10.1039/d6an00320f)
Supplement: d6an00320f1.pdf [file d6an00320f1.pdf]

## Supporting Information

### Synergistic Peroxidase-like Activity of Cu-Zn MOF-Incorporated g-C<sub>3</sub>N<sub>4</sub> Nanozyme Integrated with a Smartphone-based Colorimetric Sensing of Ciprofloxacin

Surendhar Sasikumar<sup>a</sup>, Arunjegan Amalraj<sup>b</sup>, Panneerselvam Perumal<sup>a\*</sup>

<sup>a</sup>Department of Chemistry, SRM Institute of Science and Technology, Kattankulathur, 603203 Tamil Nadu, India.

<sup>b</sup>School of the Environment and Safety Engineering, Jiangsu University, Zhenjiang 212013, China.

#### 1. Instrumentation

To determine the elemental composition and distribution of Cu-Zn-MOF/g-C<sub>3</sub>N<sub>4</sub>, X-ray photoelectron spectroscopy (XPS) was utilized with magnesium as the radiation source (PerkinElmer Phi 1600 ESCA). X-ray diffraction measurements were collected using a BRUKER USA D8 Advance Davinci diffractometer with Cu K $\alpha$  radiation at angles ranging from 5 to 90° to analyze the crystalline phase of the prepared materials. The surface morphologies and microstructures of the synthesized Cu-Zn-MOF/g-C<sub>3</sub>N<sub>4</sub> were examined using a high-resolution scanning electron microscope (Thermo Scientific Apreo S) at 20 kV. In contrast, the internal morphology was examined using a high-resolution transmission electron microscope (JEOL Japan, JEM-2100 Plus). The ISIS300 energy dispersive X-ray spectroscopy (EDXS) equipment was used to determine the profiles of copper, zinc, nitrogen, carbon, and oxygen on the surface of Cu-Zn-MOF/g-C<sub>3</sub>N<sub>4</sub>, providing insight into the surface chemistry of these materials. Fourier Transform-Infrared (FT-IR) spectroscopy with an observation range of 400-4000 cm<sup>-1</sup> (SHIMADZU, IRTRACER 100) was utilized to observe the stretching frequencies of functional groups, which can provide information about the chemical structure of the oxide. Quantachrome ASiQwin instrument used for the adsorption-desorption isotherm studies. Particle size distribution and surface were analysed by Zeta potential. The absorbance intensity of the tender sensor was analyzed by a UV-Vis spectrometer.

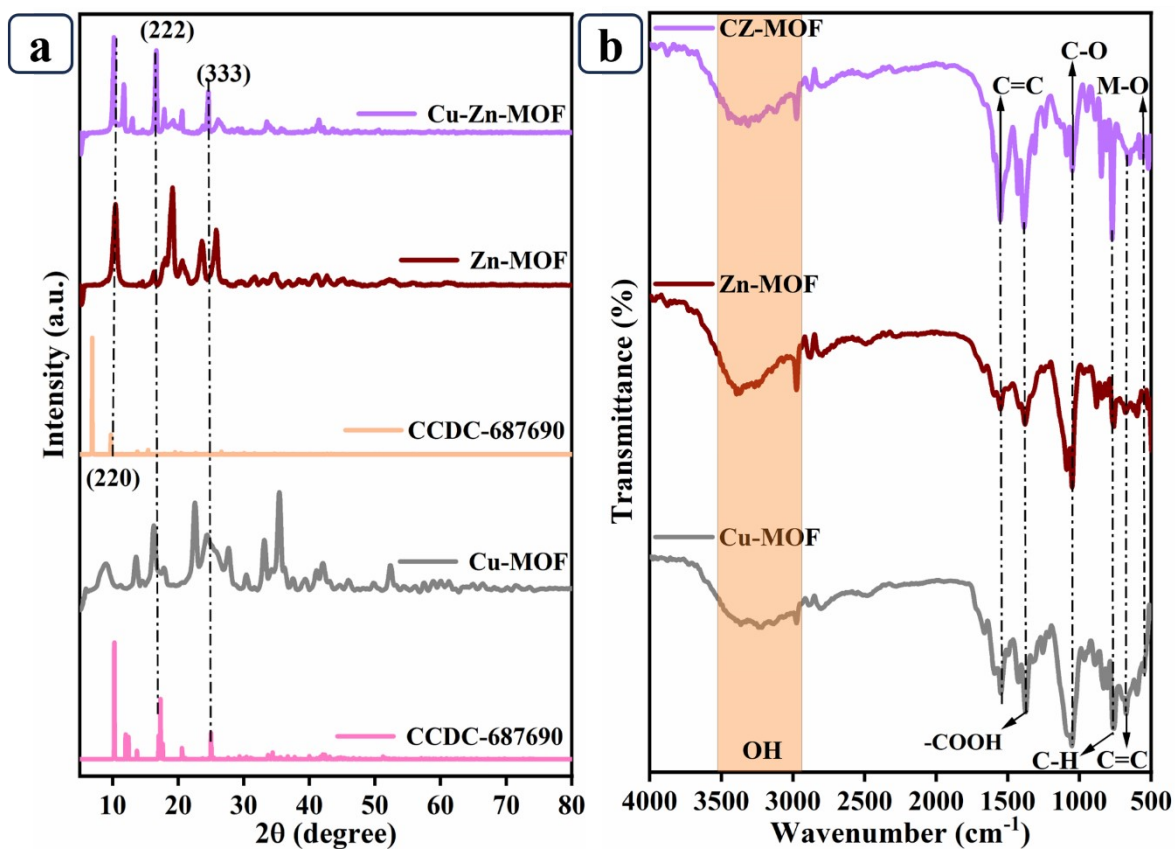

Fig. S1 (a) XRD and (b) FTIR spectrum of Cu-MOF, Zn-MOF and Cu-Zn-MOF.

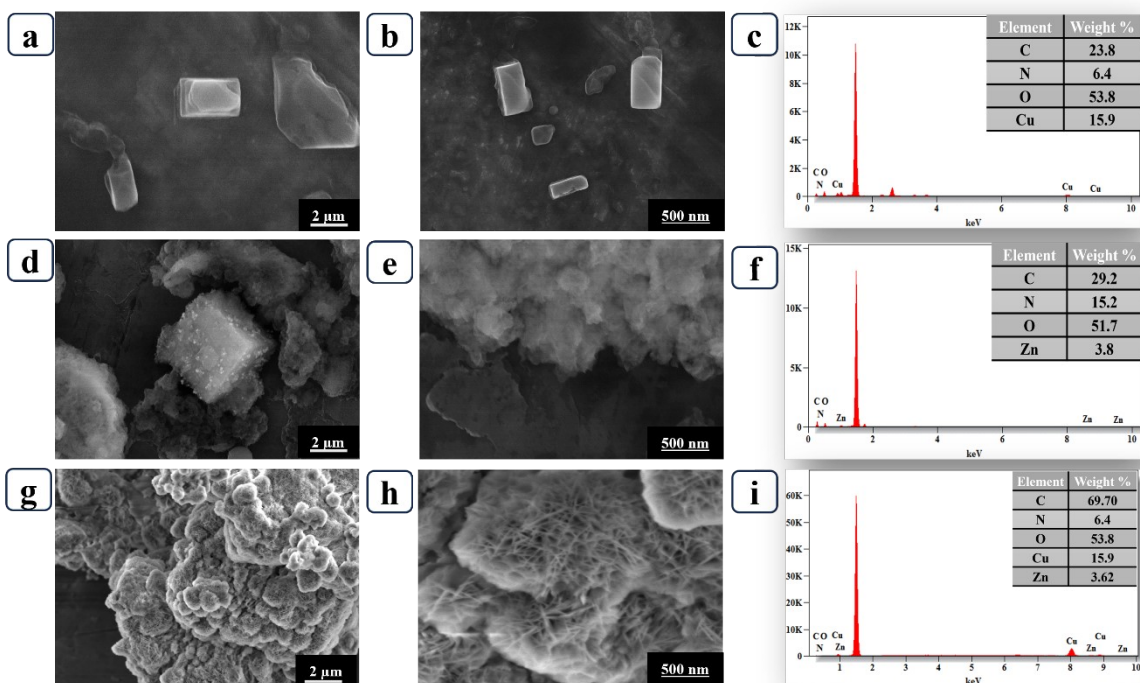

Fig. S2 HR-SEM micrographs and EDX of (a, b, c) Cu-MOF, (d, e, f) Zn-MOF, and (g, h, i) Cu-Zn-MOF.

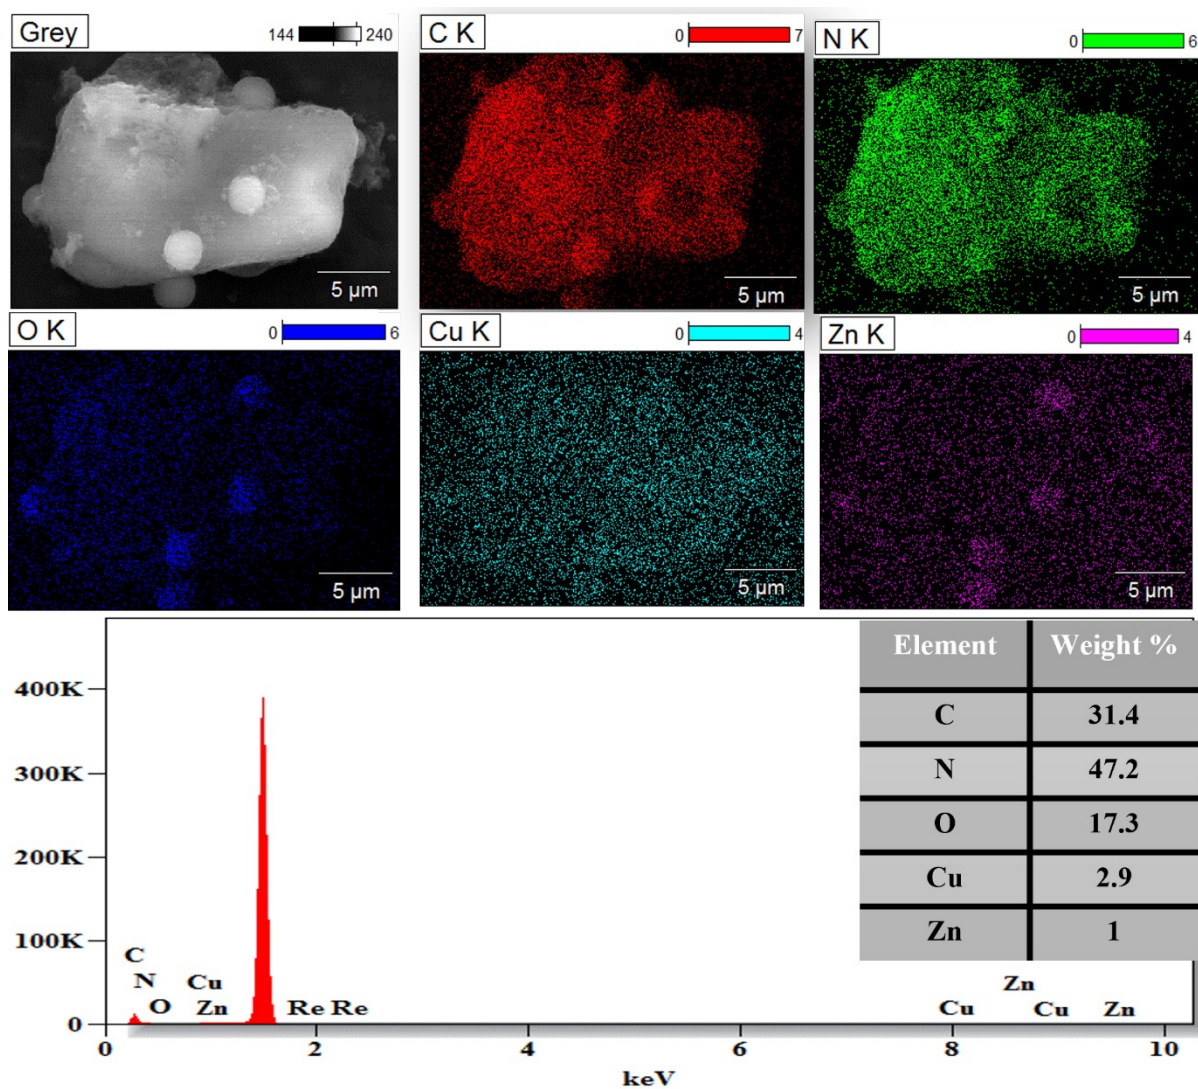

**Fig. S3** HR-SEM elemental mapping images and EDX spectrum of Cu-Zn-MOF/g-C<sub>3</sub>N<sub>4</sub>.

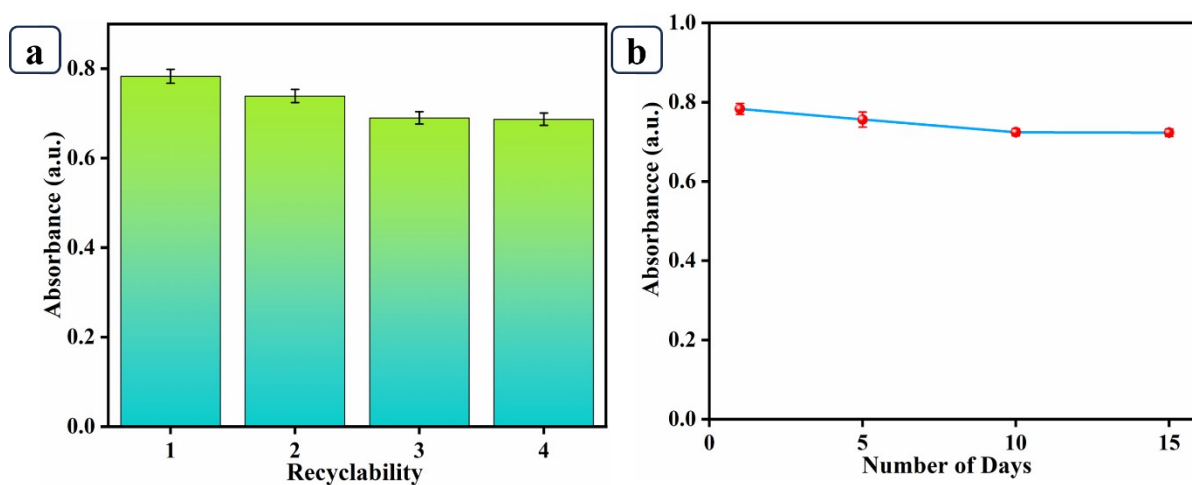

**Fig. S4 (a)** Recyclability of Cu-Zn-MOF/g-C<sub>3</sub>N<sub>4</sub> nanozyme. **(b)** Stability of Cu-Zn-MOF/g-C<sub>3</sub>N<sub>4</sub> nanozyme.

**Table S1** Comparison between the proposed ciprofloxacin sensor and other known methods

| S.No | Sensor                                                      | Linear range              | LOD                        | Real sample                        | Reference |
|------|-------------------------------------------------------------|---------------------------|----------------------------|------------------------------------|-----------|
| 1    | Spectrophotometric                                          | 2-8 $\mu\text{g ml}^{-1}$ | 1.65 $\mu\text{g ml}^{-1}$ | Ciprofloxacin hydrochloride tablet | 1         |
| 2    | ATG-AuNPs                                                   | 0-100 $\mu\text{M}$       | 1.30 $\mu\text{M}$         | Tap and lake water                 | 2         |
| 3    | Uv spectrophotometric                                       | -                         | 18.9 $\mu\text{M}$         | Ciproxin tablet                    | 3         |
| 4    | Fe@g-C <sub>3</sub> N <sub>4</sub> (Electrochemical sensor) | 0.001-1.0 $\mu\text{M}$   | 5.4 nM                     | Blood sample                       | 4         |
| 5    | $\beta$ -galactosidase enzyme                               | 1-1000 $\mu\text{M}$      | 51 $\mu\text{M}$           | Cow milk                           | 5         |
| 6    | PUE-AuNPs                                                   | -                         | 3 $\mu\text{M}$            | Tap water and Cow milk             | 6         |
| 7    | 4WJ/COS/AuNPs nanozyme                                      | 0.0014-1.4 $\mu\text{M}$  | 961.0 $\mu\text{M}$        | seafood samples                    | 7         |
| 8    | Colorimetric sensor                                         | 2 – 100 $\mu\text{M}$     | 0.6 $\mu\text{M}$          | Drinking, tap, and lake water      | This work |

## Reference

- 1 M. S. Mohammed, H. H. El-Feky, T. Y. Mohammed and S. A. Shama, *Asian Journal of Chemical Sciences*, 2022, 45–53.
- 2 L. Zhang, J. Li, J. Wang, X. Yan, J. Song and F. Feng, *Sensors* 2025, Vol. 25, DOI:10.3390/s25103228.
- 3 S. Naveed and N. Waheed, DOI:10.1128/AAC.00306-13.
- 4 H. Shivarudraiah Vedhavathi, ; Ballur, P. Sanjay, M. Basavaraju, ; Beejaganahalli, S. Madhukar and N. Kumara Swamy, *J. Electrochem. Sci. Eng*, 2022, **12**, 59–70.
- 5 T. Zehra, F. Ahsan, M. A. Versiani, S. Wahid, S. Jahangir and M. R. Shah, *Turk. J. Chem.*, 2021, **45**, 1814.
- 6 R. M. Kalunke, G. Grasso, R. D'Ovidio, R. Dragone and C. Frazzolis, *Microchemical Journal*, 2018, **136**, 128–132.
- 7 W. Wang, L. Zhang, W. Dong, K. Wei, J. Li, J. Sun, S. Wang and X. Mao, *J. Hazard. Mater.*, DOI:10.1016/j.jhazmat.2023.131995.
